# Supplementary material for: A Physiologically Based Pharmacokinetic (PBPK) Modeling Framework for Mixtures of Dioxin-like Compounds
Source: MDPI journal article supplement (doi:10.3390/toxics10110700), 2022-11-17
Supplement: s1 [file s1]

**Table S1. ODEs of the Human DLC Mixture PBPK Model**

|    |                                                      |                                                                                                                                                                                                                                                                                                                                                                                                                                                                                                                                 |
|----|------------------------------------------------------|---------------------------------------------------------------------------------------------------------------------------------------------------------------------------------------------------------------------------------------------------------------------------------------------------------------------------------------------------------------------------------------------------------------------------------------------------------------------------------------------------------------------------------|
| 1  | Amount in GI track                                   | $\frac{dMST}{dt} = - (KST + KABS) \odot MST + ORAL\_DOSE\_RATE$                                                                                                                                                                                                                                                                                                                                                                                                                                                                 |
| 2  | Amount absorbed into lymph circulation               | $\frac{dLYMLUM}{dt} = KABS \odot MST \odot a$                                                                                                                                                                                                                                                                                                                                                                                                                                                                                   |
| 3  | Amount absorbed into portal circulation              | $\frac{dLIMLUM}{dt} = KABS \odot MST \odot b$                                                                                                                                                                                                                                                                                                                                                                                                                                                                                   |
| 4  | Amount of urinary excretion                          | $\frac{dAURI}{dt} = CLURI \odot CB$                                                                                                                                                                                                                                                                                                                                                                                                                                                                                             |
| 5  | Amount in fat blood                                  | $\frac{dAFB}{dt} = QF * (CA - \frac{AFB}{VFB}) - PAF \odot (\frac{AFB}{VFB} - (\frac{AF}{VF}) \odot \frac{1}{PF})$                                                                                                                                                                                                                                                                                                                                                                                                              |
| 6  | Amount in fat tissue                                 | $\frac{dAF}{dt} = PAF \odot (\frac{AFB}{VFB} - (\frac{AF}{VF}) \odot \frac{1}{PF})$                                                                                                                                                                                                                                                                                                                                                                                                                                             |
| 7  | Amount in RB blood                                   | $\frac{dARBB}{dt} = QRB * (CA - \frac{ARBB}{VRBB}) - PARB \odot (\frac{ARBB}{VRBB} - \frac{ARB}{VRB} \odot \frac{1}{PRB})$                                                                                                                                                                                                                                                                                                                                                                                                      |
| 8  | Amount in RB tissue                                  | $\frac{dARB}{dt} = PARB \odot (\frac{ARBB}{VRBB} - \frac{ARB}{VRB} \odot \frac{1}{PRB})$                                                                                                                                                                                                                                                                                                                                                                                                                                        |
| 9  | Amount in liver blood                                | $\frac{dALB}{dt} = QL * (CA - \frac{ALB}{VLB}) - PAL \odot (\frac{ALB}{VLB} - (\frac{AL}{VL}) \odot \frac{1}{PL}) + KABS \odot MST \odot b$                                                                                                                                                                                                                                                                                                                                                                                     |
| 10 | Amount of free and nonspecific bound in liver tissue | $\begin{aligned} \frac{dAL}{dt} = & PAL \odot (\frac{ALB}{VLB} - (\frac{AL}{VL}) \odot \frac{1}{PL}) + (-kelim \odot (\frac{AL}{VL}) \odot \frac{1}{PL} * \frac{CYP1A2 + \Sigma(\frac{A\_Dioxin\_CYP1A2}{VL}) - CYP1A2\_1BASAL}{CYP1A2\_1BASAL} - kfAHR \odot \\ & (\frac{AL}{VL}) \odot \frac{1}{PL} * (AHR_{tot} - \Sigma(\frac{A\_Dioxin\_AHR}{VL}))) + kbAHR \odot \frac{A\_Dioxin\_AHR}{VL} - kf1A2 \odot (\frac{AL}{VL}) \odot \frac{1}{PL} * CYP1A2 + kb1A2 \odot \\ & \frac{A\_Dioxin\_CYP1A2}{VL}) * VL \end{aligned}$ |
| 11 | Amount of Dioxin-AHR complex                         | $\frac{dA\_Dioxin\_AHR}{dt} = (kfAHR \odot (\frac{AL}{VL}) \odot \frac{1}{PL} * (AHR_{tot} - \Sigma(\frac{A\_Dioxin\_AHR}{VL}))) - kbAHR \odot \frac{A\_Dioxin\_AHR}{VL} * VL$                                                                                                                                                                                                                                                                                                                                                  |

|    |                                 |                                                                                                                                                                                                                            |
|----|---------------------------------|----------------------------------------------------------------------------------------------------------------------------------------------------------------------------------------------------------------------------|
| 12 | Amount of Dioxin-CYP1A2 complex | $\frac{dA\_Dioxin\_CYP1A2}{dt} = (kf1A2 \odot (\frac{AL}{VL}) \odot \frac{1}{PL} * CYP1A2 - kb1A2 \odot \frac{A\_Dioxin\_CYP1A2}{VL}) * VL$                                                                                |
| 13 | Concentration of CYP1A2 mRNA    | $\frac{dCYP1A2\_mRNA}{dt} = ktranscription\_1A2 * (1 + \frac{CYP1A2\_1EMAX * (\Sigma \frac{A\_Dioxin\_AHR}{VL})^{0.6}}{CYP1A2\_1EC50^{0.6} + (\Sigma \frac{A\_Dioxin\_AHR}{VL})^{0.6}}) - kdegCYP1A2\_mRNA * CYP1A2\_mRNA$ |
| 14 | Concentration of free CYP1A2    | $\frac{dCYP1A2}{dt} = ktranslation\_1A2 * CYP1A2\_mRNA - kdegCYP1A2 * CYP1A2 - \Sigma(kf1A2 \odot (\frac{AL}{VL}) \odot \frac{1}{PL} * CYP1A2) + \Sigma(kb1A2 \odot \frac{A\_Dioxin\_CYP1A2}{VL})$                         |
