# Supplementary material for: A Physiologically Based Pharmacokinetic (PBPK) Modeling Framework for Mixtures of Dioxin-like Compounds
Source: MDPI journal article supplement (doi:10.3390/toxics10110700), 2022-11-17
Supplement: s1 [file s1]

**Table S4. Monte Carlo Oral Dosing Parameters**

|                      | Mean (ng/kg bw/day) | CV   |
|----------------------|---------------------|------|
| 2,3,4,7,8-PeCDF      | 3.90E-04            | 0.55 |
| 1,2,3,7,8-PeCDF      | 6.00E-05            | 0.42 |
| 2,3,7,8-TCDF         | 3.50E-04            | 0.7  |
| 1,2,3,4,7,8-HxCDF    | 4.60E-04            | 0.4  |
| 2,3,7,8-TCDD         | 6.00E-05            | 0.35 |
| 1,2,3,6,7,8-HxCDF    | 2.30E-04            | 0.4  |
| 1,2,3,4,6,7,8-HpCDD  | 2.50E-03            | 0.8  |
| 1,2,3,4,6,7,8-HpCDF  | 8.60E-04            | 0.43 |
| 1,2,3,7,8-PeCDD      | 8.00E-05            | 0.47 |
| 1,2,3,4,6,7,8,9-OCDD | 1.95E-02            | 0.64 |
| 1,2,3,4,6,7,8,9-OCDF | 1.16E-03            | 0.54 |

**Note:** These dietary intake values were estimated for a Dutch population in 1994 (Liem et al. 2000) Each congener's daily exposure dose is sampled from lognormal distributions with the means and coefficients of variation (CV).
