# Supplementary material for: A Physiologically Based Pharmacokinetic (PBPK) Modeling Framework for Mixtures of Dioxin-like Compounds
Source: MDPI journal article supplement (doi:10.3390/toxics10110700), 2022-11-17
Supplement: s1 [file s1]

**Table S2. Physiological and Biochemical Parameters of the Human DLC Mixture PBPK Model**

| Parameter                                          | Symbol                               | Value or Equation                                                                                                                                                                                                                                                                                                                                                                                  | Unit   |
|----------------------------------------------------|--------------------------------------|----------------------------------------------------------------------------------------------------------------------------------------------------------------------------------------------------------------------------------------------------------------------------------------------------------------------------------------------------------------------------------------------------|--------|
| Body weight                                        | <i>BW</i>                            | <b>Male:</b><br>$0.00058 \cdot \text{ageInYears}^3 - 0.0948 \cdot \text{ageInYears}^2 + 4.8434 \cdot \text{ageInYears} + 2.2785$<br><b>Female:</b><br>$0.0006 \cdot \text{ageInYears}^3 - 0.0912 \cdot \text{ageInYears}^2 + 4.3200 \cdot \text{ageInYears} + 3.6520$                                                                                                                              | kg     |
| Tissue volume fraction of <i>BW</i>                |                                      |                                                                                                                                                                                                                                                                                                                                                                                                    |        |
| Liver                                              | <i>VLC</i>                           | $3.59\text{E-}2 - 4.76\text{E-}7 \cdot BW^{1\text{E}3}$<br>$+ 8.50\text{E-}12 \cdot (BW^{1\text{E}3})^2 - 5.45\text{E-}17 \cdot (BW^{1\text{E}3})^3$                                                                                                                                                                                                                                               | -      |
| Fat                                                | <i>VFC</i>                           | <b>Male:</b><br>$- 5.26\text{E-}20 \cdot (BW^{1000})^4 + 1.09\text{E-}14 \cdot (BW^{1000})^3$<br>$- 6.99\text{E-}10 \cdot (BW^{1000})^2 + 1.59\text{E-}5 \cdot BW^{1000}$<br>$+ 3.95\text{E-}2$<br><b>Female:</b><br>$- 6.36\text{E-}20 \cdot (BW^{1000})^4 + 1.12\text{E-}14 \cdot (BW^{1000})^3$<br>$- 5.8\text{E-}10 \cdot (BW^{1000})^2 + 1.2\text{E-}5 \cdot BW^{1000}$<br>$+ 5.91\text{E-}2$ | -      |
| Rest of Body (RB)                                  | <i>VRBC</i>                          | $(0.91 - VLBC \cdot VLC - VFBC \cdot VFC - VLC - VFC) /$<br>$(1 + VRBBC)$                                                                                                                                                                                                                                                                                                                          | -      |
| Tissue blood volume fraction                       |                                      |                                                                                                                                                                                                                                                                                                                                                                                                    |        |
| Liver                                              | <i>VLBC</i>                          | 0.266                                                                                                                                                                                                                                                                                                                                                                                              | -      |
| Fat                                                | <i>VFBC</i>                          | 0.05                                                                                                                                                                                                                                                                                                                                                                                               | -      |
| RB                                                 | <i>VRBBC</i>                         | 0.03                                                                                                                                                                                                                                                                                                                                                                                               | -      |
| Cardiac Output                                     | <i>QCC</i>                           | 15.36                                                                                                                                                                                                                                                                                                                                                                                              | L/kg/h |
| Tissue fractional blood flow of <i>QCC</i>         |                                      |                                                                                                                                                                                                                                                                                                                                                                                                    |        |
| Liver                                              | <i>QLC</i>                           | 0.266                                                                                                                                                                                                                                                                                                                                                                                              | -      |
| Fat                                                | <i>QFC</i>                           | 0.05                                                                                                                                                                                                                                                                                                                                                                                               | -      |
| RB                                                 | <i>QRBC</i>                          | 0.03                                                                                                                                                                                                                                                                                                                                                                                               | -      |
| AHR total                                          | <i>AHR<sub>tot</sub></i>             | 0.35                                                                                                                                                                                                                                                                                                                                                                                               | nM     |
| Basal concentration of CYP1A2                      | <i>CYP1A2_1BASAL</i>                 | 1600                                                                                                                                                                                                                                                                                                                                                                                               | nM     |
| Affinity constant of AHR-mediated CYP1A2 induction | <i>CYP1A2_1EC50</i>                  | 130                                                                                                                                                                                                                                                                                                                                                                                                | nM     |
| Maximal fold of CYP1A2 induction                   | <i>CYP1A2_1EMAX</i>                  | 9300                                                                                                                                                                                                                                                                                                                                                                                               | -      |
| Rate constant of CYP1A2 mRNA transcription         | <i>k<sub>transcription_1A2</sub></i> | 16                                                                                                                                                                                                                                                                                                                                                                                                 | nM/h   |

|                                             |                       |       |     |
|---------------------------------------------|-----------------------|-------|-----|
| Rate constant of CYP1A2<br>mRNA degradation | $kdeg_{CYP1A2\_mRNA}$ | 0.1   | 1/h |
| Rate constant of CYP1A2<br>translation      | $ktranslation\_1A2$   | 1.25  | 1/h |
| Rate constant of CYP1A2<br>degradation      | $kdeg_{CYP1A2}$       | 0.125 | 1/h |

**Note:** All parameter values or equations are from Emond et al. 2018, except for  $ktranslation\_1A2$ ,  $kdeg_{CYP1A2}$ ,  $ktranscription\_1A2$ , and  $kdeg_{CYP1A2\_mRNA}$ , which were adjusted such that the basal and maximally induced steady-state levels of CYP1A2 remain the same as in the Emond model and the steady-state mRNA level was kept to be 10% of the protein level.
